# Supplementary material for: Burden of whooping cough in China (PertussisChina): study protocol of a prospective, population-based case–control study
Source: PubMed Central journal article supplement — BMJ Open. 2022 Mar 10;12(3):e053316. doi: 10.1136/bmjopen-2021-053316 (PMC8915282; doi:10.1136/bmjopen-2021-053316), 2022-03-10
Supplement: bmjopen-2021-053316supp001.pdf [file bmjopen-2021-053316supp001.pdf]

## Supplementary Appendix

**Title:** Burden of Whooping Cough in China (PertussisChina): Study Protocol of a Prospective, Population-based Case-control Study

**Running head:** PertussisChina Study, 2020

### Tables & Forms

- Supplementary Table 1. Survey questionnaire for healthcare utilization and attitudes survey of cough illness among children under 5 years old
- Supplementary Table 2. Survey questionnaire for healthcare utilization and attitudes survey of cough illness among persons aged 5 years and older
- Supplementary Table 3. Case screening and ascertainment form
- Supplementary Table 4. Baseline information of case & control (CRF—T0)
- Supplementary Table 5. Follow-up information of case (CRF—T2w/T4w/T8w)
- Supplementary Table 6. Outcome of case at the end of follow-up (CRF—Tend)

**Supplementary Table 1.** Survey questionnaire for healthcare utilization and attitudes survey of cough illness among children under 5 years old

Greetings! We are the staff of Center for Disease Control and Prevention. We sincerely invite you to participate in this questionnaire survey. The purpose of the survey is to study the utilization and attitudes of community residents towards health-care services of chronic/persistent cough, so that we can better serve you in the future.

This survey is anonymous. Your answers to these questions are kept confidential. You can choose whether to participate in the survey voluntarily or not. Refusal of the survey will not have any adverse consequences on you personally and your children. If you agree to participate, please read each question carefully and fill in the answer on your own. Thank you for your support and cooperation!

**Part I. Basic Information**

1.1 Site: \_\_\_\_\_ Site ID: \_\_\_\_\_

1.2 Your length of time (years & months) living in the site (e.g. Yiwu or Yongcheng):

less than 6 months     six months and over

1.3 Current address: \_\_\_\_\_ county \_\_\_\_\_ street \_\_\_\_\_ community/village

1.4 Type of respondents in relation to the studied subject/children:

mother     father     grandma/grandpa     others \_\_\_\_\_

1.5 Date of Birth:    □□□□/□□/□□ (yyyy/MM/dd)

1.6 Gender:     Male     Female

1.7 Ethnicity:     Han     others \_\_\_\_\_

1.8 Did your child attend school?     yes     no

1.9 Your occupation (of the respondent who answered the question):

students     housework or unemployed     retired people     commercial & service sector workers     food handler or employees of food industry  
 specialists, including teacher, medical personnel and workers     agriculture, forestry, animal husbandry and fishery workers     others \_\_\_\_\_

1.10 Your educational attainment (of the respondent who answered the question).

- primary school or illiteracy     middle school     high school  
 technical secondary school     college level and above

1.11 Including yourself, there are \_\_\_\_\_ members in your family (defined as those who shared the same dining table in the house)?

Of which, there are \_\_\_\_\_ children under five years old.

1.12 Is there any smokers or ex-smokers in your family?     yes     no

## Part II. self-perceived illness and health-care seeking behavior

2.1 Did your children experienced cough during the past one month prior to our interview?     no     yes

2.1.1 If yes, how long did the cough last?

- <1 week     1-2 weeks     3-4 weeks     5-8 weeks     >8 weeks

2.1.2 If yes, what is the clinical characteristics of the last episode of cough?

- paroxysmal cough     vomiting after coughing     whooping cough  
 cough worsening during the night     vomiting after coughing  
 productive cough with large amount of sputum     dry cough  
 cough with blood in sputum     others \_\_\_\_\_

2.1.3 If yes, what is the other concomitant symptoms?

- productive cough     running nose     fever (body temperature  $\geq 37.2^{\circ}\text{C}$ )  
 belching     acid reflux     irritable and crying     vomiting     headache  
 tachypnea     earache     sore throat     dyspnea     abdominal pain  
 arthralgia     chest pain     myalgia     fatigue     lethargy  
 burn after sternum     without any other discomfort     others \_\_\_\_\_

2.1.4 If yes, what do you think is the most probable cause of your cough?

- respiratory tract infection     inhalation of foreign objects in the respiratory tract  
 COPD exacerbation     asthma exacerbation     recurrent tuberculosis  
 chronic cardiopulmonary disease     lung cancer     inhalation of cold air  
 chronic bronchitis     bronchiectasis     I don't know     others \_\_\_\_\_

## 2.2 Did your child visit a doctor or seek healthcare during the last episode of cough?

no  yes

### 2.2.1 If yes, where did your child see a doctor?

(For Yiwu site, please select the following)

- The Fourth Affiliated Hospital Zhejiang University School of Medicine
- Yiwu Fuyuan Hospital Yiwu Maternal and Children's Hospital
- Yiwu Central Hospital Yiwu Traditional Chinese Medicine Hospital
- Yiwu Tianxiang Medical Group Dongfang Hospital
- Chouzhou Hospital of Yiwu The Second People's Hospital of Yiwu
- The Third People's Hospital of Yiwu Yiting township Health Center
- Suxi Township Health Center Beiyuan Community Health Center
- Shangxi Township Health Center Dachen Township Health Center
- Houzhai Community Health Center Chi'an Township Health Center
- Chengxi Community Health Center Niansanli Community Health Center
- Yiwu Huashan Rehabilitation Hospital Jiangdong Community Health Center
- Futian Community Health Center Yiwu Dermatology Hospital
- Zhejiang Children's Hospital Village clinics or private clinics
- others\_\_\_\_\_

(For Yongcheng site, please select the following)

- Yongcheng People's Hospital Yongcheng Central Hospital
- Yongmei Group General Hospital Henan Shenhua Group General Hospital
- Yongcheng Maternal & Child Health Hospital Yucheng Township Health Center
- Chenji Township Health Center Gaozhuang Township Health Center
- Yongcheng Mangdang Hospital Lizhai Township Health Center
- Yongcheng Second People's Hospital Liuhe Township Health Center
- Yanji Township Health Center Dawangji Township Health Center
- Longgang Township Health Center Shunhe Township Health Center
- Peiqiao Township Health Center Huaihai Community Health Center
- Huangkou Township Health Center Maqiao Township Health Center
- Jiangkou Township Health Center Houling Township Health Center

- Chenguanzhuang Township Health Center
- Taiqiu Township Health Center
- Wolong Township Health Center
- Huicun Township Health Center
- Yongcheng Traditional Chinese Medicine Hospital
- Shibali Township Health Center
- Xuehu Township Health Center
- Mamu Township Health Center
- Xinqiao Township Health Center
- Xunyang Township Health Center
- Shuangqiao Township Health Center
- Yongcheng Jiangkou Yongji Hospital
- Miaoqiao Township Health Center
- Yongcheng Tuberculosis Hospital
- Tiaohe Township Health Center
- Zhongyuan Road Community Health Center
- Yongcheng Wuguanke Hospital
- Mangshan Township Health Center
- Luanhu Township Health Center
- others\_\_\_\_\_

#### 2.2.1 If no, why did not your child see a doctor?

- Symptoms are mild, no need to see a doctor
- The hospital is too far from home and the transportation is inconvenient
- Drugs purchased in pharmacies
- Distrust the doctor
- Unaffordable high medical expenses
- Hospital facilities and environment were poor
- others\_\_\_\_\_

#### 2.3 Was your child hospitalized for the last episode of cough? no yes

##### 2.3.1 If yes, where was your child hospitalized?

(For Yiwu site, please select the following)

- The Fourth Affiliated Hospital Zhejiang University School of Medicine
- Yiwu Fuyuan Hospital
- Yiwu Maternal and Children's Hospital
- Yiwu Central Hospital
- Yiwu Traditional Chinese Medicine Hospital
- Yiwu Tianxiang Medical Group Dongfang Hospital
- Chouzhou Hospital of Yiwu
- The Second People's Hospital of Yiwu
- The Third People's Hospital of Yiwu
- Yiting township Health Center
- Suxi Township Health Center
- Beiyuan Community Health Center
- Shangxi Township Health Center
- Dachen Township Health Center

- Houzhai Community Health Center    Chi'an Township Health Center  
 Chengxi Community Health Center    Niansanli Community Health Center  
 Yiwu Huashan Rehabilitation Hospital    Jiangdong Community Health Center  
 Futian Community Health Center    Yiwu Dermatology Hospital  
 Zhejiang Children's Hospital    Village clinics or private clinics  
 others \_\_\_\_\_

(For Yongcheng site, please select the following)

- Yongcheng People's Hospital    Yongcheng Central Hospital  
 Yongmei Group General Hospital    Henan Shenhua Group General Hospital  
 Yongcheng Maternal & Child Health Hospital    Yucheng Township Health Center  
 Chenji Township Health Center    Gaozhuang Township Health Center  
 Yongcheng Mangdang Hospital    Lizhai Township Health Center  
 Yongcheng Second People's Hospital    Liuhe Township Health Center  
 Yanji Township Health Center    Dawangji Township Health Center  
 Longgang Township Health Center    Shunhe Township Health Center  
 Peiqiao Township Health Center    Huaihai Community Health Center  
 Huangkou Township Health Center    Maqiao Township Health Center  
 Jiangkou Township Health Center    Houling Township Health Center  
 Chenguanzhuang Township Health Center    Taiqiu Township Health Center  
 Wolong Township Health Center    Huicun Township Health Center  
 Yongcheng Traditional Chinese Medicine Hospital  
 Shibali Township Health Center    Xuehu Township Health Center  
 Mamu Township Health Center    Xinqiao Township Health Center  
 Xunyang Township Health Center    Shuangqiao Township Health Center  
 Yongcheng Jiangkou Yongji Hospital    Miaoqiao Township Health Center  
 Yongcheng Tuberculosis Hospital    Tiaohe Township Health Center  
 Zhongyuan Road Community Health Center    Yongcheng Wuguanke Hospital  
 Mangshan Township Health Center    Luanhu Township Health Center  
 others

### Part III. Attitudes towards health-care utilization

(Next, we will ask some questions about the actions you might take under some hypothetical situations that do not need to happen.)

3.1 If your child keeps coughing for 2 weeks but does not get better, and you have decided to see a doctor, which one of the following medical institutions would you choose to go?

(For Yiwu site, please select the following)

- The Fourth Affiliated Hospital Zhejiang University School of Medicine
- Yiwu Fuyuan Hospital    Yiwu Maternal and Children's Hospital
- Yiwu Central Hospital    Yiwu Traditional Chinese Medicine Hospital
- Yiwu Tianxiang Medical Group Dongfang Hospital
- Chouzhou Hospital of Yiwu    The Second People's Hospital of Yiwu
- The Third People's Hospital of Yiwu    Yiting township Health Center
- Suxi Township Health Center    Beiyuan Community Health Center
- Shangxi Township Health Center    Dachen Township Health Center
- Houzhai Community Health Center    Chi'an Township Health Center
- Chengxi Community Health Center    Niansanli Community Health Center
- Yiwu Huashan Rehabilitation Hospital    Jiangdong Community Health Center
- Futian Community Health Center    Yiwu Dermatology Hospital
- Zhejiang Children's Hospital    Village clinics or private clinics
- others\_\_\_\_\_

(For Yongcheng site, please select the following)

- Yongcheng People's Hospital    Yongcheng Central Hospital
- Yongmei Group General Hospital    Henan Shenhua Group General Hospital
- Yongcheng Maternal & Child Health Hospital    Yucheng Township Health Center
- Chenji Township Health Center    Gaozhuang Township Health Center
- Yongcheng Mangdang Hospital    Lizhai Township Health Center
- Yongcheng Second People's Hospital    Liuhe Township Health Center
- Yanji Township Health Center    Dawangji Township Health Center

- Longgang Township Health Center
- Shunhe Township Health Center
- Peiqiao Township Health Center
- Huaihai Community Health Center
- Huangkou Township Health Center
- Maqiao Township Health Center
- Jiangkou Township Health Center
- Houling Township Health Center
- Chenguanzhuang Township Health Center
- Taiqiu Township Health Center
- Wolong Township Health Center
- Huicun Township Health Center
- Yongcheng Traditional Chinese Medicine Hospital
- Shibali Township Health Center
- Xuehu Township Health Center
- Mamu Township Health Center
- Xinqiao Township Health Center
- Xunyang Township Health Center
- Shuangqiao Township Health Center
- Yongcheng Jiangkou Yongji Hospital
- Miaoqiao Township Health Center
- Yongcheng Tuberculosis Hospital
- Tiaohu Township Health Center
- Zhongyuan Road Community Health Center
- Yongcheng Wuguanke Hospital
- Mangshan Township Health Center
- Luanhu Township Health Center
- others\_\_\_\_\_

3.2 If the doctor recommends that your child be hospitalized, which one of the following medical institutions would you choose?

(For Yiwu site, please select the following)

- The Fourth Affiliated Hospital Zhejiang University School of Medicine
- Yiwu Fuyuan Hospital
- Yiwu Maternal and Children's Hospital
- Yiwu Central Hospital
- Yiwu Traditional Chinese Medicine Hospital
- Yiwu Tianxiang Medical Group Dongfang Hospital
- Chouzhou Hospital of Yiwu
- The Second People's Hospital of Yiwu
- The Third People's Hospital of Yiwu
- Yiting township Health Center
- Suxi Township Health Center
- Beiyuan Community Health Center
- Shangxi Township Health Center
- Dachen Township Health Center
- Houzhai Community Health Center
- Chi'an Township Health Center
- Chengxi Community Health Center
- Niansanli Community Health Center
- Yiwu Huashan Rehabilitation Hospital
- Jiangdong Community Health Center
- Futian Community Health Center
- Yiwu Dermatology Hospital



Zhejiang Children's Hospital  Village clinics or private clinics

others \_\_\_\_\_

(For Yongcheng site, please select the following)

Yongcheng People's Hospital  Yongcheng Central Hospital

Yongmei Group General Hospital  Henan Shenhua Group General Hospital

Yongcheng Maternal & Child Health Hospital  Yucheng Township Health Center

Chenji Township Health Center  Gaozhuang Township Health Center

Yongcheng Mangdang Hospital  Lizhai Township Health Center

Yongcheng Second People's Hospital  Liuhe Township Health Center

Yanji Township Health Center  Dawangji Township Health Center

Longgang Township Health Center  Shunhe Township Health Center

Peiqiao Township Health Center  Huaihai Community Health Center

Huangkou Township Health Center  Maqiao Township Health Center

Jiangkou Township Health Center  Houling Township Health Center

Chenguanzhuang Township Health Center  Taiqiu Township Health Center

Wolong Township Health Center  Huicun Township Health Center

Yongcheng Traditional Chinese Medicine Hospital

Shibali Township Health Center  Xuehu Township Health Center

Mamu Township Health Center  Xinqiao Township Health Center

Xunyang Township Health Center  Shuangqiao Township Health Center

Yongcheng Jiangkou Yongji Hospital  Miaoqiao Township Health Center

Yongcheng Tuberculosis Hospital  Tiaohe Township Health Center

Zhongyuan Road Community Health Center  Yongcheng Wuguanke Hospital

Mangshan Township Health Center  Luanhu Township Health Center

others \_\_\_\_\_

#### Part IV. Other questions

4.1 Has your child ever received the following vaccines?

influenza vaccine  pneumococcal vaccine  Haemophilus influenzae vaccine

Vaccines containing pertussis components (i.e. DTP)

4.1.1 If received vaccines containing pertussis (i.e. DTP), what kind of the vaccine?

cDTaP  DTaP/Hib  DTaP-IPV/Hib

4.2 Your family's average annual income (Chinese Yuan) is,

<50,000  50,000-90,000  100,000-190,000  200,000-490,000  ≥500,000

4.3 Your phone number is \_\_\_\_\_

Thank you very much for taking your time. The information you provided in this interview is very valuable to help us improve our work. Wish you a happy life!

Time of survey started: □□□□/□□/□□:□□:□□ (yyyy/MM/dd hh:mm)

Time of survey ended: □□□□/□□/□□:□□:□□ (yyyy/MM/dd hh:mm)

Investigator: \_\_\_\_\_ Supervisor: \_\_\_\_\_

Supplementary Table 2. Survey questionnaire for healthcare utilization and attitudes survey of cough illness among persons aged 5 years and older

Greetings! We are the staff of Center for Disease Control and Prevention. We sincerely invite you to participate in this questionnaire survey. The purpose of the survey is to study the utilization and attitudes of community residents towards health-care services of chronic/persistent cough, so that we can better serve you in the future.

This survey is anonymous. Your answers to these questions are kept confidential. You can choose whether to participate in the survey voluntarily or not. Refusal of the survey will not have any adverse consequences on you personally and your children. If you agree to the participate, please read each question carefully and fill in the answer on your own. Thank you for your support and cooperation!

**Part I. Basic Information**

1.1 Site: \_\_\_\_\_ Site ID: \_\_\_\_\_

1.2 Your length of time (years & months) living in the site (e.g. Yiwu or Yongcheng):

less than 6 months  six months and over

1.3 Current address: \_\_\_\_\_ county \_\_\_\_\_ street \_\_\_\_\_ community/village

1.4 Type of respondents in relation to the studied subject:

respondent himself is the study subject  others \_\_\_\_\_

1.5 Date of Birth: □□□□/□□/□□ (yyyy/MM/dd)

1.6 Gender:  Male  Female

1.7 Ethnicity:  Han  others \_\_\_\_\_

1.8 Your occupation:

students  housework or unemployed  retired people  commercial & service sector workers  food handler or employees of food industry  specialists, including teacher, medical personnel and workers  agriculture, forestry, animal husbandry and fishery workers  others \_\_\_\_\_

1.9 Did you ever contact with dust/chemical materials in the working environment in the past one year, such as those encountered by workers using pneumatic drills at

construction sites, miners, painters, benzene solvents in leather production, etc.

no  yes

1.10 Your educational attainment:

primary school or illiteracy  middle school  high school  
 technical secondary school  college level and above

1.11 Including yourself, there are \_\_\_\_\_ members in your family (defined as those who shared the same dining table in the house)?

Of which, there are \_\_\_\_\_ children under five years old.

1.12 Are you smoker or ex-smoker?  yes  no

## Part II. self-perceived illness and health-care seeking behavior

2.1 Did you experienced cough during the past one month prior to our interview?

no  yes

2.1.1 If yes, how long did the cough last?

<1 week  1-2 weeks  3-4 weeks  5-8 weeks  >8 weeks

2.1.2 If yes, what is the clinical characteristics of the last episode of cough?

paroxysmal cough  vomiting after coughing  whooping cough  
 cough worsening during the night  vomiting after coughing  
 productive cough with large amount of sputum  dry cough  
 cough with blood in sputum  others \_\_\_\_\_

2.1.3 If yes, what is the other concomitant symptoms?

productive cough  running nose  fever (body temperature  $\geq 37.2^{\circ}\text{C}$ )  
 belching  acid reflux  irritable and crying  vomiting  headache  
 tachypnea  earache  sore throat  dyspnea  abdominal pain  
 arthralgia  chest pain  myalgia  fatigue  lethargy  
 burn after sternum  without any other discomfort  others \_\_\_\_\_

2.1.4 If yes, what do you think is the most probable cause of your cough?

respiratory tract infection  inhalation of foreign objects in the respiratory tract  
 COPD exacerbation  asthma exacerbation  recurrent tuberculosis

- chronic cardiopulmonary disease lung cancer inhalation of cold air  
chronic bronchitis bronchiectasis I don't know others\_\_\_\_\_

2.2 Did you see a doctor or seek healthcare during the last episode of cough?

- no  yes

2.2.1 If yes, where did you see a doctor?

(For Yiwu site, please select the following)

- The Fourth Affiliated Hospital Zhejiang University School of Medicine  
Yiwu Fuyuan Hospital Yiwu Maternal and Children's Hospital  
Yiwu Central Hospital Yiwu Traditional Chinese Medicine Hospital  
Yiwu Tianxiang Medical Group Dongfang Hospital  
Chouzhou Hospital of Yiwu The Second People's Hospital of Yiwu  
The Third People's Hospital of Yiwu Yiting township Health Center  
Suxi Township Health Center Beiyuan Community Health Center  
Shangxi Township Health Center Dachen Township Health Center  
Houzhai Community Health Center Chi'an Township Health Center  
Chengxi Community Health Center Niansanli Community Health Center  
Yiwu Huashan Rehabilitation Hospital Jiangdong Community Health Center  
Futian Community Health Center Yiwu Dermatology Hospital  
Zhejiang Children's Hospital Village clinics or private clinics  
others\_\_\_\_\_

(For Yongcheng site, please select the following)

- Yongcheng People's Hospital Yongcheng Central Hospital  
Yongmei Group General Hospital Henan Shenhua Group General Hospital  
Yongcheng Maternal & Child Health Hospital Yucheng Township Health Center  
Chenji Township Health Center Gaozhuang Township Health Center  
Yongcheng Mangdang Hospital Lizhai Township Health Center  
Yongcheng Second People's Hospital Liuhe Township Health Center  
Yanji Township Health Center Dawangji Township Health Center  
Longgang Township Health Center Shunhe Township Health Center  
Peiqiao Township Health Center Huaihai Community Health Center

- Huangkou Township Health Center     Maqiao Township Health Center  
 Jiangkou Township Health Center     Houling Township Health Center  
 Chenguanzhuang Township Health Center     Taiqiu Township Health Center  
 Wolong Township Health Center     Huicun Township Health Center  
 Yongcheng Traditional Chinese Medicine Hospital  
 Shibali Township Health Center     Xuehu Township Health Center  
 Mamu Township Health Center     Xinqiao Township Health Center  
 Xunyang Township Health Center     Shuangqiao Township Health Center  
 Yongcheng Jiangkou Yongji Hospital     Miaoqiao Township Health Center  
 Yongcheng Tuberculosis Hospital     Tiaohe Township Health Center  
 Zhongyuan Road Community Health Center     Yongcheng Wuguanke Hospital  
 Mangshan Township Health Center     Luanhu Township Health Center  
 others\_\_\_\_\_

2.2.1 If no, why did not you see a doctor?

- Symptoms are mild, no need to see a doctor  
 The hospital is too far from home and the transportation is inconvenient  
 Drugs purchased in pharmacies     Distrust the doctor  
 Unaffordable high medical expenses  
 Hospital facilities and environment were poor  
 others\_\_\_\_\_

2.3 Were you hospitalized for the last episode of cough?     no     yes

2.3.1 If yes, where were you hospitalized?

(For Yiwu site, please select the following)

- The Fourth Affiliated Hospital Zhejiang University School of Medicine  
 Yiwu Fuyuan Hospital     Yiwu Maternal and Children's Hospital  
 Yiwu Central Hospital     Yiwu Traditional Chinese Medicine Hospital  
 Yiwu Tianxiang Medical Group Dongfang Hospital  
 Chouzhou Hospital of Yiwu     The Second People's Hospital of Yiwu  
 The Third People's Hospital of Yiwu     Yiting township Health Center  
 Suxi Township Health Center     Beiyuan Community Health Center

- Shangxi Township Health Center   Dachen Township Health Center  
Houzhai Community Health Center   Chi'an Township Health Center  
Chengxi Community Health Center   Niansanli Community Health Center  
Yiwu Huashan Rehabilitation Hospital   Jiangdong Community Health Center  
Futian Community Health Center   Yiwu Dermatology Hospital  
Zhejiang Children's Hospital   Village clinics or private clinics  
others\_\_\_\_\_

(For Yongcheng site, please select the following)

- Yongcheng People's Hospital   Yongcheng Central Hospital  
Yongmei Group General Hospital   Henan Shenhua Group General Hospital  
Yongcheng Maternal & Child Health Hospital   Yucheng Township Health Center  
Chenji Township Health Center   Gaozhuang Township Health Center  
Yongcheng Mangdang Hospital   Lizhai Township Health Center  
Yongcheng Second People's Hospital   Liuhe Township Health Center  
Yanji Township Health Center   Dawangji Township Health Center  
Longgang Township Health Center   Shunhe Township Health Center  
Peiqiao Township Health Center   Huaihai Community Health Center  
Huangkou Township Health Center   Maqiao Township Health Center  
Jiangkou Township Health Center   Houling Township Health Center  
Chenguanzhuang Township Health Center   Taiqiu Township Health Center  
Wolong Township Health Center   Huicun Township Health Center  
Yongcheng Traditional Chinese Medicine Hospital  
Shibali Township Health Center   Xuehu Township Health Center  
Mamu Township Health Center   Xinqiao Township Health Center  
Xunyang Township Health Center   Shuangqiao Township Health Center  
Yongcheng Jiangkou Yongji Hospital   Miaoqiao Township Health Center  
Yongcheng Tuberculosis Hospital   Tiaohe Township Health Center  
Zhongyuan Road Community Health Center   Yongcheng Wuguanke Hospital  
Mangshan Township Health Center   Luanhu Township Health Center  
others\_\_\_\_\_

### Part III. Attitudes towards health-care utilization

(Next, we will ask some questions about the actions you might take under some hypothetical situations that do not need to happen.)

3.1 If you keep coughing for 2 weeks but does not get better, and you have decided to see a doctor, which one of the following medical institutions would you choose to go?

(For Yiwu site, please select the following)

- The Fourth Affiliated Hospital Zhejiang University School of Medicine
- Yiwu Fuyuan Hospital   Yiwu Maternal and Children's Hospital
- Yiwu Central Hospital   Yiwu Traditional Chinese Medicine Hospital
- Yiwu Tianxiang Medical Group Dongfang Hospital
- Chouzhou Hospital of Yiwu   The Second People's Hospital of Yiwu
- The Third People's Hospital of Yiwu   Yiting township Health Center
- Suxi Township Health Center   Beiyuan Community Health Center
- Shangxi Township Health Center   Dachen Township Health Center
- Houzhai Community Health Center   Chi'an Township Health Center
- Chengxi Community Health Center   Niansanli Community Health Center
- Yiwu Huashan Rehabilitation Hospital   Jiangdong Community Health Center
- Futian Community Health Center   Yiwu Dermatology Hospital
- Zhejiang Children's Hospital   Village clinics or private clinics
- others\_\_\_\_\_

(For Yongcheng site, please select the following)

- Yongcheng People's Hospital   Yongcheng Central Hospital
- Yongmei Group General Hospital   Henan Shenhua Group General Hospital
- Yongcheng Maternal & Child Health Hospital   Yucheng Township Health Center
- Chenji Township Health Center   Gaozhuang Township Health Center
- Yongcheng Mangdang Hospital   Lizhai Township Health Center
- Yongcheng Second People's Hospital   Liuhe Township Health Center
- Yanji Township Health Center   Dawangji Township Health Center
- Longgang Township Health Center   Shunhe Township Health Center



- Peiqiao Township Health Center
- Huaihai Community Health Center
- Huangkou Township Health Center
- Maqiao Township Health Center
- Jiangkou Township Health Center
- Houling Township Health Center
- Chenguanzhuang Township Health Center
- Taiqiu Township Health Center
- Wolong Township Health Center
- Huicun Township Health Center
- Yongcheng Traditional Chinese Medicine Hospital
- Shibali Township Health Center
- Xuehu Township Health Center
- Mamu Township Health Center
- Xinqiao Township Health Center
- Xunyang Township Health Center
- Shuangqiao Township Health Center
- Yongcheng Jiangkou Yongji Hospital
- Miaoqiao Township Health Center
- Yongcheng Tuberculosis Hospital
- Tiaohe Township Health Center
- Zhongyuan Road Community Health Center
- Yongcheng Wuguanke Hospital
- Mangshan Township Health Center
- Luanhu Township Health Center
- others\_\_\_\_\_

3.2 If the doctor recommends that you should be hospitalized, which one of the following medical institutions would you choose?

(For Yiwu site, please select the following)

- The Fourth Affiliated Hospital Zhejiang University School of Medicine
- Yiwu Fuyuan Hospital
- Yiwu Maternal and Children's Hospital
- Yiwu Central Hospital
- Yiwu Traditional Chinese Medicine Hospital
- Yiwu Tianxiang Medical Group Dongfang Hospital
- Chouzhou Hospital of Yiwu
- The Second People's Hospital of Yiwu
- The Third People's Hospital of Yiwu
- Yiting township Health Center
- Suxi Township Health Center
- Beiyuan Community Health Center
- Shangxi Township Health Center
- Dachen Township Health Center
- Houzhai Community Health Center
- Chi'an Township Health Center
- Chengxi Community Health Center
- Niansanli Community Health Center
- Yiwu Huashan Rehabilitation Hospital
- Jiangdong Community Health Center
- Futian Community Health Center
- Yiwu Dermatology Hospital
- Zhejiang Children's Hospital
- Village clinics or private clinics

others\_\_\_\_\_

(For Yongcheng site, please select the following)

- Yongcheng People's Hospital Yongcheng Central Hospital
- Yongmei Group General Hospital Henan Shenhua Group General Hospital
- Yongcheng Maternal & Child Health Hospital Yucheng Township Health Center
- Chenji Township Health Center Gaozhuang Township Health Center
- Yongcheng Mangdang Hospital Lizhai Township Health Center
- Yongcheng Second People's Hospital Liuhe Township Health Center
- Yanji Township Health Center Dawangji Township Health Center
- Longgang Township Health Center Shunhe Township Health Center
- Peiqiao Township Health Center Huaihai Community Health Center
- Huangkou Township Health Center Maqiao Township Health Center
- Jiangkou Township Health Center Houling Township Health Center
- Chenguanzhuang Township Health Center Taiqiu Township Health Center
- Wolong Township Health Center Huicun Township Health Center
- Yongcheng Traditional Chinese Medicine Hospital
- Shibali Township Health Center Xuehu Township Health Center
- Mamu Township Health Center Xinqiao Township Health Center
- Xunyang Township Health Center Shuangqiao Township Health Center
- Yongcheng Jiangkou Yongji Hospital Miaoqiao Township Health Center
- Yongcheng Tuberculosis Hospital Tiaohe Township Health Center
- Zhongyuan Road Community Health Center Yongcheng Wuguanke Hospital
- Mangshan Township Health Center Luanhu Township Health Center
- others\_\_\_\_\_

#### Part IV. Other questions

4.1 Have you ever received the following vaccines?

- influenza vaccine pneumococcal vaccine Haemophilus influenzae vaccine
- Vaccines containing pertussis components (i.e. DTP)

4.1.1 If received vaccines containing pertussis (i.e. DTP), what kind of the vaccine?

cDTaP  DTaP/Hib  DTaP-IPV/Hib

4.2 Your family's average annual income (Chinese Yuan) is,

<50,000  50,000-90,000  100,000-190,000  200,000-490,000  ≥500,000

4.3 Your phone number is \_\_\_\_\_

Thank you very much for taking your time. The information you provided in this interview is very valuable to help us improve our work. Wish you a happy life!

Time of survey started: □□□□/□□/□□:□□:□□ (yyyy/MM/dd hh:mm)

Time of survey ended: □□□□/□□/□□:□□:□□ (yyyy/MM/dd hh:mm)

Investigator: \_\_\_\_\_ Supervisor: \_\_\_\_\_

Supplementary Table 3. Case screening and ascertainment form

Name of Hospital \_\_\_\_\_ Departments \_\_\_\_\_

|                                                                             |                          |                          |                                                               |
|-----------------------------------------------------------------------------|--------------------------|--------------------------|---------------------------------------------------------------|
| Name of patient                                                             |                          | Sex                      | <input type="checkbox"/> male <input type="checkbox"/> female |
| Birthdate                                                                   |                          | Ethnicity                |                                                               |
| Current address                                                             |                          | Phone number             |                                                               |
| Date of illness onset                                                       |                          | Date of admission        |                                                               |
| Date of written informed consent signed                                     |                          |                          |                                                               |
| <b>Lists of inclusion &amp; exclusion criteria</b>                          | <b>yes</b>               | <b>no</b>                |                                                               |
| <b>Inclusion criteria:</b>                                                  |                          |                          |                                                               |
| <b>Patient regardless of ages:</b>                                          |                          |                          |                                                               |
| 1.cough of $\geq 2$ weeks duration;                                         | <input type="checkbox"/> | <input type="checkbox"/> |                                                               |
| 2.had one or more of the following symptoms;                                | <input type="checkbox"/> | <input type="checkbox"/> |                                                               |
| – paroxysmal cough;                                                         | <input type="checkbox"/> |                          |                                                               |
| – inspiratory whoop;                                                        | <input type="checkbox"/> |                          |                                                               |
| – post-tussive vomiting.                                                    | <input type="checkbox"/> |                          |                                                               |
| <b>Infants less than one year old</b>                                       |                          |                          |                                                               |
| 1.cough (regardless of cough duration);                                     | <input type="checkbox"/> | <input type="checkbox"/> |                                                               |
| 2.had one or more of the following symptoms;                                | <input type="checkbox"/> | <input type="checkbox"/> |                                                               |
| – paroxysmal cough;                                                         | <input type="checkbox"/> |                          |                                                               |
| – inspiratory whoop;                                                        | <input type="checkbox"/> |                          |                                                               |
| – post-tussive vomiting;                                                    | <input type="checkbox"/> |                          |                                                               |
| – apnea.                                                                    | <input type="checkbox"/> |                          |                                                               |
| Written informed consent signed                                             | <input type="checkbox"/> | <input type="checkbox"/> |                                                               |
| If you answer “No” to any of the above, the patient cannot enter the study. |                          |                          |                                                               |
| <b>Exclusion criteria:</b>                                                  |                          |                          |                                                               |
| 1.not a permanent resident (lived less than 6 months at the site);          | <input type="checkbox"/> | <input type="checkbox"/> |                                                               |
| 2.gastroesophageal reflux;                                                  | <input type="checkbox"/> | <input type="checkbox"/> |                                                               |
| 3.spastic bronchitis;                                                       | <input type="checkbox"/> | <input type="checkbox"/> |                                                               |
| 4.diagnosed tuberculosis;                                                   | <input type="checkbox"/> | <input type="checkbox"/> |                                                               |
| 5.lung mycoplasma/chlamydia infection;                                      | <input type="checkbox"/> | <input type="checkbox"/> |                                                               |
| 6.chronic sinusitis;                                                        | <input type="checkbox"/> | <input type="checkbox"/> |                                                               |
| 7.adults/adolescents with a measured body temperature of $\geq 38.5$ °C;    | <input type="checkbox"/> | <input type="checkbox"/> |                                                               |
| 8. researchers considered not suitable for participating in the study.      | <input type="checkbox"/> | <input type="checkbox"/> |                                                               |
| If you answer Yes” to any of the above, the patient cannot enter the study. |                          |                          |                                                               |
| Whether the patient is included in the study                                | <input type="checkbox"/> | <input type="checkbox"/> |                                                               |
| If no, what is the reason for not included?                                 |                          |                          |                                                               |
| – not meet the inclusion & exclusion criteria;                              | <input type="checkbox"/> | <input type="checkbox"/> |                                                               |
| – Refuse to participate ;                                                   | <input type="checkbox"/> | <input type="checkbox"/> |                                                               |
| If yes, what is the patient identifier no.? _____                           | <input type="checkbox"/> | <input type="checkbox"/> |                                                               |

Supplementary Table 4. Baseline information of case &amp; control (CRF—T0)

Patient identifier no.: \_\_\_\_\_ Type:  Inpatient  outpatient  Control

**Name :** \_\_\_\_\_ ( or **Parents' name :** \_\_\_\_\_ ) **Sex :**  male  female **Ethnicity :**  Han  other \_\_\_\_\_  
**Birthdate :** \_\_\_\_/\_\_\_\_/\_\_\_\_ (YYYY/mm/dd) **Preterm baby :**  yes , ( gestational age \_\_\_\_ weeks )  no  
**Address\* :** \_\_\_\_\_ **mobile phone :** \_\_\_\_\_  
**Family member No. :** \_\_\_\_\_ persons **No. of children under five in the family :** \_\_\_\_\_ children  
**Smokers in the family :**  yes , ( \_\_\_\_ persons )  no **Smoking :**  yes  no **Drinking :**  yes  no  
**Occupation :**  
 kindergarten children  preschool children  students  teacher  childcares  food industry worker  commercial service  
 medical staff  factory workers  migrant worker  farmer  herdsman  fishermen  cadre  retired  housewife  
 others  unknown

**Clinical characteristics (within 24h before and after admission)**

**Illness onset Date :** \_\_\_\_ (YYYY/mm/dd) **Primary diagnosis :** \_\_\_\_\_ **Diagnose date :** \_\_\_\_ (YYYY/mm/dd)  
**Hospitalized :**  yes  no **Admission diagnosis :** \_\_\_\_\_ **Admission date :** \_\_\_\_ (YYYY/mm/dd)  
 cough ( Starting date \_\_\_\_/\_\_\_\_/\_\_\_\_ [YYYY/mm/dd] , duration \_\_\_\_ days )  
 post-tussive vomiting  paroxysmal cough  whooping cough  apnea  cyanosis  fever ( body temperature \_\_\_\_ °C )  
 cough worsening in night  productive cough; Sputum color : yellow/white/black/glass like  
 seizure  hemoptysis  chills  headache  myalgia  sore throat  joint pain  chest pain  
 sweat  shortness-of-breath  running nose  lachrymation  fatigue  other( \_\_\_\_\_ )  
**Complications :**  pneumonia ( radiographical evidence :  yes  no )  atelectasis  pulmonary hypertension  
 encephalopathy  seizure  others ( \_\_\_\_\_ )  
**Blood tests :** WBC \_\_\_\_ ×10<sup>9</sup>/L; L \_\_\_\_ ×10<sup>9</sup>/L; N \_\_\_\_ ×10<sup>9</sup>/L; Plt \_\_\_\_ ×10<sup>9</sup>/L; Hb \_\_\_\_ g/L; CRP \_\_\_\_ mg/L; GLU \_\_\_\_ mmol/L  
**Physical check :** body temperature : \_\_\_\_ °C **Breath rate :** \_\_\_\_ breath/min **Heart rate :** \_\_\_\_ beats/min  
**Systolic/diastolic blood pressure :** \_\_\_\_/\_\_\_\_ mmHg **Pulse oximetry:** sPO<sub>2</sub> (if any): \_\_\_\_ %  
**Lung auscultation :**  dry rale  wet rale **Consciousness :** clear/lethargy/irritable/delirium/convulsions/coma

**Treatment (one week before admission)**

- ( 1 ) Drug name : Please give the name of the drug, or the trade name if it is a fixed compound preparation  
( 2 ) Category: A=antibiotic (1. Amoxicillin; 2. Amoxicillin-clavulanic acid; 3. Ampicillin; 4. Azithromycin; 5. Ceftriaxone; 6. Cefuroxime; 7. Ciprofloxacin; 8. Clarithromycin; 9. Doxycycline; 10. Erythromycin; 11. Penicillin; 12. Tetracycline; 13. Compound sulfamethoxazole); B=antiviral drugs; C=steroid hormone drugs  
( 3 ) Route : 1=oral, 2=intravenous injection, 3=intravenous drip, 4=intramuscular injection, 5=inhalation, 6=other  
( 4 ) Frequency : 1= continuous , 2=intermittent

| Drug name<br>(1) | Category<br>(2) | Route<br>(3) | Daily dose |      | Frequency<br>(4) | Starting date<br>(YYYY/mm/dd) | Stop date<br>(YYYY/mm/dd) |
|------------------|-----------------|--------------|------------|------|------------------|-------------------------------|---------------------------|
|                  |                 |              | dose       | unit |                  |                               |                           |
|                  |                 |              |            |      |                  |                               |                           |
|                  |                 |              |            |      |                  |                               |                           |
|                  |                 |              |            |      |                  |                               |                           |
|                  |                 |              |            |      |                  |                               |                           |
|                  |                 |              |            |      |                  |                               |                           |
|                  |                 |              |            |      |                  |                               |                           |
|                  |                 |              |            |      |                  |                               |                           |

| Vaccination history of DTP3 (for children aged under 14 years old)                                                                                                                                                                                                                                                                                                                      |            |          |        |      |      |                      |                         |
|-----------------------------------------------------------------------------------------------------------------------------------------------------------------------------------------------------------------------------------------------------------------------------------------------------------------------------------------------------------------------------------------|------------|----------|--------|------|------|----------------------|-------------------------|
| <b>Source of data :</b> <input type="checkbox"/> vaccination certificate <input type="checkbox"/> linkage with national database <input type="checkbox"/> self-reports<br><b>Reasons of unvaccinated :</b> 1. Contraindications; 2. Under the age of vaccination; 3. Missed vaccination time; 4. Parents refused to vaccination; 5. migrating population; 6. Don't know; 7. Others_____ |            |          |        |      |      |                      |                         |
| dose                                                                                                                                                                                                                                                                                                                                                                                    | lot number | producer | dosage |      | site | Date<br>(YYYY/mm/dd) | Reasons of unvaccinated |
|                                                                                                                                                                                                                                                                                                                                                                                         |            |          | dose   | unit |      |                      |                         |
| 1                                                                                                                                                                                                                                                                                                                                                                                       |            |          |        |      |      |                      |                         |
| 2                                                                                                                                                                                                                                                                                                                                                                                       |            |          |        |      |      |                      |                         |
| 3                                                                                                                                                                                                                                                                                                                                                                                       |            |          |        |      |      |                      |                         |
| Patient specimen collection                                                                                                                                                                                                                                                                                                                                                             |            |          |        |      |      |                      |                         |
| <b>Specimen collected :</b> <input type="checkbox"/> yes <input type="checkbox"/> no <b>Date of sampling :</b> ____/____/____(YYYY/mm/dd)<br><b>Type of specimen :</b> Nasopharyngeal swab <input type="checkbox"/> amounts : _____<br>Whole blood <input type="checkbox"/> quantity : _____ ml                                                                                         |            |          |        |      |      |                      |                         |
| <b>Hospital :</b> _____ <b>Investigator :</b> _____ <b>Date of reporting :</b> ____/____/____(YYYY/mm/dd)                                                                                                                                                                                                                                                                               |            |          |        |      |      |                      |                         |

Supplementary Table 5. Follow-up information of case (CRF—T<sub>2w</sub>/T<sub>4w</sub>/T<sub>8w</sub>)

Patient identifier no.: \_\_\_\_\_ Type:  Inpatient  Outpatient

**Name :** \_\_\_\_\_ ( or **Parents' name :** \_\_\_\_\_ ) **Sex :**  male  female

**Illness onset date :** \_\_\_\_/\_\_\_\_/\_\_\_\_(YYYY/mm/dd) **Admission date :** \_\_\_\_/\_\_\_\_/\_\_\_\_(YYYY/mm/dd)

**Follow-up date :** \_\_\_\_/\_\_\_\_/\_\_\_\_(YYYY/mm/dd) **Weeks of follow-up:**  2 wks  4 wks  8 wks

**Follow-up method:**  hospital visits  home visits

**Outcomes**

**Survival:**  yes  no **Date of death:** \_\_\_\_/\_\_\_\_/\_\_\_\_(YYYY/mm/dd) **death diagnosis :** \_\_\_\_\_

**Hospitalized :**  yes  no **Re-admitted into hospital after discharge:**  yes  no

**Reasons for re-admission :** Pneumonia/heart failure/cardiogenic shock/encephalopathy/Seizure/other \_\_\_\_\_

**Lost to follow-up:**  yes  no (refers to 3 consecutive phone calls to patients on different working days but no answers at all )

**Clinical characteristics (during follow-up visits)**

cough ( Starting date \_\_\_\_/\_\_\_\_/\_\_\_\_ [YYYY/mm/dd] , duration \_\_\_\_ days )

post-tussive vomiting  paroxysmal cough  whooping cough  apnea  cyanosis  fever ( body temperature \_\_\_\_°C )

cough worsening in night  productive cough; Sputum color : yellow/white/black/glass like

seizure  hemoptysis  chills  headache  myalgia  sore throat  joint pain  chest pain

sweat  shortness-of-breath  running nose  lachrymation  fatigue  other( \_\_\_\_\_ )

**Blood tests :** WBC \_\_\_\_ × 10<sup>9</sup>/L; L \_\_\_\_ × 10<sup>9</sup>/L; N \_\_\_\_ × 10<sup>9</sup>/L; Plt \_\_\_\_ × 10<sup>9</sup>/L; Hb \_\_\_\_ g/L; CRP \_\_\_\_ mg/L; GLU \_\_\_\_ mmol/L

**Physical check :** body temperature : \_\_\_\_°C **Breath rate :** \_\_\_\_ breath/min **Heart rate :** \_\_\_\_ beats/min

**Systolic/diastolic blood pressure :** \_\_\_\_/\_\_\_\_ mmHg **Pulse oximetry:** sPO<sub>2</sub> (if any): \_\_\_\_%

**Lung auscultation :**  dry rale  wet rale **Consciousness :** clear/lethargy/irritable/delirium/convulsions/coma

**Patient specimen collection**

**Specimen collected :**  yes  no **Date of sampling :** \_\_\_\_/\_\_\_\_/\_\_\_\_(YYYY/mm/dd)

**Type of specimen :** Nasopharyngeal swab  amounts : \_\_\_\_\_

Whole blood  quantity : \_\_\_\_\_ ml

**Reasons for not sampling :**  without coughing symptoms for 1 week  refusal to sampling

**Hospital :** \_\_\_\_\_ **Investigator :** \_\_\_\_\_ **Date of follow-up :** \_\_\_\_/\_\_\_\_/\_\_\_\_(YYYY/mm/dd)

Supplementary Table 6. Outcome of case at the end of follow-up (CRF—T<sub>end</sub>)

Patient identifier no.: \_\_\_\_\_ Type:  inpatient  outpatient

Name : \_\_\_\_\_ ( or Parents' name : \_\_\_\_\_ ) Sex  male  female Illness onset date : \_\_\_\_/\_\_\_\_/\_\_\_\_(YYYY/mm/dd)  
 Admission date : \_\_\_\_/\_\_\_\_/\_\_\_\_(YYYY/mm/dd) Discharge date : \_\_\_\_/\_\_\_\_/\_\_\_\_(YYYY/mm/dd)  
 Discharge diagnosis : primary diagnosis \_\_\_\_\_  
 secondary diagnosis 1. \_\_\_\_\_ 2. \_\_\_\_\_ 3. \_\_\_\_\_

**Treatment during hospitalization**

Admitting into ICU :  yes  no \_\_\_\_/\_\_\_\_/\_\_\_\_(YYYY/mm/dd)  
 1. Transfer in date \_\_\_\_/\_\_\_\_/\_\_\_\_(YYYY/mm/dd) Transfer out date \_\_\_\_/\_\_\_\_/\_\_\_\_(YYYY/mm/dd)  
 2. Transfer in date \_\_\_\_/\_\_\_\_/\_\_\_\_(YYYY/mm/dd) Transfer out date \_\_\_\_/\_\_\_\_/\_\_\_\_(YYYY/mm/dd)  
 3. Transfer in date \_\_\_\_/\_\_\_\_/\_\_\_\_(YYYY/mm/dd) Transfer out date \_\_\_\_/\_\_\_\_/\_\_\_\_(YYYY/mm/dd)  
 Oxygen therapy :  yes  no duration : \_\_\_\_\_ days  
 Invasive ventilation :  yes  no duration : \_\_\_\_\_ days (invasive ventilation refers to tracheal intubation or tracheotomy)  
 Non-invasive ventilation:  yes  no duration : \_\_\_\_\_ days  
 Oscillating respirator :  yes  no duration : \_\_\_\_\_ days  
 ECMO or interventional lung adjuvant therapy ( iLA )  yes  no date of treatment start : \_\_\_\_/\_\_\_\_/\_\_\_\_(YYYY/mm/dd)  
 Renal replacement therapy/dialysis :  yes  no date of treatment start : \_\_\_\_/\_\_\_\_/\_\_\_\_(YYYY/mm/dd)  
 Exchange transfusion :  yes  no date of treatment start : \_\_\_\_/\_\_\_\_/\_\_\_\_(YYYY/mm/dd)  
 Leukophoresis or leukoreduction therapy :  yes  no date of treatment start : \_\_\_\_/\_\_\_\_/\_\_\_\_(YYYY/mm/dd)

**Drugs**

( 1 ) Drug name : Please give the name of the drug, or the trade name if it is a fixed compound preparation  
 ( 2 ) Category: A=antibiotic (1. Amoxicillin; 2. Amoxicillin-clavulanic acid; 3. Ampicillin; 4. Azithromycin; 5. Ceftriaxone; 6. Cefuroxime; 7. Ciprofloxacin; 8. Clarithromycin; 9. Doxycycline; 10. Erythromycin; 11. Penicillin; 12. Tetracycline; 13. Compound sulfamethoxazole); B=antiviral drugs; C=steroid hormone drugs  
 ( 3 ) Route : 1=oral, 2=intravenous injection, 3=intravenous drip, 4=intramuscular injection, 5=inhalation, 6=other  
 ( 4 ) Frequency : 1= continuous , 2=intermittent

| drug name<br>(1) | category<br>(2) | route<br>(3) | daily dose |      | frequency<br>(4) | starting date<br>(YYYY/mm/dd) | stop date<br>(YYYY/mm/dd) |
|------------------|-----------------|--------------|------------|------|------------------|-------------------------------|---------------------------|
|                  |                 |              | dose       | unit |                  |                               |                           |
|                  |                 |              |            |      |                  |                               |                           |
|                  |                 |              |            |      |                  |                               |                           |

**Clinical characteristics**

**Symptoms/signs :**  
 cough ( Starting date \_\_\_\_/\_\_\_\_/\_\_\_\_[YYYY/mm/dd] , duration \_\_\_\_\_ days )  
 post-tussive vomiting  paroxysmal cough  whooping cough  apnea  cyanosis  fever ( body temperature \_\_\_\_\_ °C )  
 cough worsening in night  productive cough; Sputum color : yellow/white/black/glass like  
 seizure  hemoptysis  chills  headache  myalgia  sore throat  joint pain  chest pain  
 sweat  shortness-of-breath  running nose  lachrymation  fatigue  other( \_\_\_\_\_ )

**Complications :**  
 viral pneumonia  cardiac arrest  bacterial pneumonia  bacteremia  acute lung injury/ARDS  heart infection  
 coagulation disorders  pneumothorax  anemia  pleural Effusion  acute kidney injury  myolysis  
 bronchiolitis  gastrointestinal hemorrhage  meningitis  pancreatitis  epilepsy  arrhythmia



|                                                                                                                                                                                                                                                                                                                                                                                                                                                                 |                      |                                                  |
|-----------------------------------------------------------------------------------------------------------------------------------------------------------------------------------------------------------------------------------------------------------------------------------------------------------------------------------------------------------------------------------------------------------------------------------------------------------------|----------------------|--------------------------------------------------|
| <input type="checkbox"/> liver insufficiency <input type="checkbox"/> stroke <input type="checkbox"/> hyperglycemia <input type="checkbox"/> hypoglycemia <input type="checkbox"/> congestive Heart Failure<br><input type="checkbox"/> other ( _____ )                                                                                                                                                                                                         |                      |                                                  |
| <b>Patient Prognosis</b>                                                                                                                                                                                                                                                                                                                                                                                                                                        |                      |                                                  |
| <input type="checkbox"/> cured<br><input type="checkbox"/> improved and be discharged<br><input type="checkbox"/> transferred to other hospital    reasons for transfer : community rehabilitation/other ( _____ )<br><input type="checkbox"/> give up treatment    reasons for give-up : economic reasons/illness exacerbation/other ( _____ )<br><input type="checkbox"/> death    date of death : ____ / ____ / ____ (YYYY/mm/dd)    death diagnosis : _____ |                      |                                                  |
| Hospital : _____                                                                                                                                                                                                                                                                                                                                                                                                                                                | Investigator : _____ | Date of record : ____ / ____ / ____ (YYYY/mm/dd) |
